# Supplementary material
Source: publisher site journal article supplement (https://www.dovepress.com/article/299037)
Supplement: Supplementary file 1 [file get_supplementary_file.php]

**Supplementary Table 1.** Description of variable characteristics.

| Categories              | Variables                                             | Cases (N=407)      | Missing Percentage (%) |
|-------------------------|-------------------------------------------------------|--------------------|------------------------|
| Vancomycin information  | Vancomycin trough concentration, mg/L, median (IQR)   | 6.88 (4.46-10.33)  | 0%                     |
|                         | Vancomycin dose, mg, median (IQR)                     | 135 (320-900)      | 0%                     |
|                         | Vancomycin medication intervals, h, median (IQR)      | 6 (6-8)            | 0%                     |
|                         | Vancomycin intravenous infusion time, h, median (IQR) | 1 (1-1)            | 0%                     |
| Demographic information | Age, y, median (IQR)                                  | 2 (0.63-5)         | 0%                     |
|                         | Height, cm, median (IQR)                              | 87.2 (69.8-111.3)  | 0%                     |
|                         | Weight, kg, median (IQR)                              | 12 (7.8-19)        | 0%                     |
|                         | Gender, n (%)                                         |                    |                        |
|                         | Male                                                  | 245 (60.2%)        | 0%                     |
|                         | Female                                                | 162 (39.8%)        |                        |
| Assay index             | ClCr, ml/min/1.73 m <sup>2</sup> , median (IQR)       | 109.3 (91.8-132.7) | 0%                     |
|                         | UA, umol/L, median (IQR)                              | 146 (93.6-215.9)   | 0%                     |
|                         | PCT, ug/L, median (IQR)                               | 0.36 (0.12-1.64)   | 0%                     |
|                         | CRP, mg/L, median (IQR)                               | 16 (8-48)          | 0%                     |
|                         | AST, U/L, median (IQR)                                | 44 (29.5-80)       | 0%                     |
|                         | ALT, U/L, median (IQR)                                | 31 (22-48)         | 0%                     |
|                         | TBIL, umol/L, median (IQR)                            | 9.1 (5.7-15.3)     | 0%                     |
|                         | DBIL, umol/L, median (IQR)                            | 0 (0-0)            | 0%                     |
|                         | TP, g/L, median (IQR)                                 | 62 (55.9-69)       | 0%                     |
|                         | RBC, 10 <sup>12</sup> /L, median (IQR)                | 3.54 (3.16-3.93)   | 0%                     |
|                         | WBC, 10 <sup>12</sup> /L, median (IQR)                | 10.1 (7.2-14.5)    | 0%                     |
|                         | PLT, 10 <sup>12</sup> /L, median (IQR)                | 293 (196.5-433)    | 0%                     |
|                         | Hb, g/L, median (IQR)                                 | 96 (87.5-108)      | 0%                     |
|                         | HCT, L/L, median (IQR)                                | 29.3 (26.8-32.4)   | 0%                     |
|                         | NEU, %, median (IQR)                                  | 63.1 (46.7-76.2)   | 0%                     |
|                         | LYM, %, median (IQR)                                  | 24.8 (14.8-38.8)   | 0%                     |

Abbreviation: IQR, interquartile range; ClCr, creatinine clearance rate; UA, uric acid; PCT, procalcitonin; CRP, C-reactive protein; AST, aspartate aminotransferase; ALT, alanine aminotransferase; TBIL, total bilirubin; DBIL, direct bilirubin; TP, total protein; RBC, red blood cells; WBC, white blood cells; PLT, platelets; Hb, hemoglobin; HCT, hematokrit; NEU, neutrophil; LYM, lymphocyte.
